# Supplementary material
Source: Research Square preprint supplement (doi:10.21203/rs.3.rs-8989407/v1)
Supplement: Supplementary file 1 [file 81d8d6860afd986fc5b41536.docx]

Supplementary materials to:

Bridging Capture Chemistry to Low-Energy Bio-Integrated CO2-to-Methane

Mads Ujarak Sieborg1,2,†, Kristian Ax2,3,†, Therese Bundgaard Jensen1, Pegah Nazari2,3, Madhuni Madhushika Wijesooriya1,2, Mads Andrup Jensen1, Kim Daasbjerg2,3,4, Michael Vedel Wegener Kofoed1,2,*

1 Department of Biological and Chemical Engineering, Aarhus University, Gustav Wieds Vej 10C, DK-8000 Aarhus C., Denmark

2 The Novo Nordisk Foundation CO2 Research Center (CORC), Aarhus University, Gustav Wieds Vej 10C, DK-8000, Denmark

3 Department of Chemistry, Aarhus University, Langelandsgade 140, 8000 Aarhus C, Denmark.

4 Interdisciplinary Nanoscience Center (iNANO), Gustav Wieds Vej 14, 8000 Aarhus C, Denmark.

† These authors contributed equally.

* Corresponding authors: Michael Vedel Wegener Kofoed ([Mvk@bce.au.dk](mailto:Mvk@bce.au.dk)) and Kim Daasbjerg ([Kdaa@chem.au.dk](mailto:Kdaa@chem.au.dk))

**1. Bio-integrated carbon capture and utilization in industrial settings**

Raw flue gas from a 625 kW biogas combustion engine was analyzed to understand what impurities industrial CO2 sources expose to the capture agents and CO2-utilizing methanogens. The flue gas contained 8.2% CO2, 84.7% N2, 7.1% O2, 206.7 ppm NOX, 83.2 ppm SOX and 339.5 ppm CO, which could affect reaction equilibrium, microbiome stability, and biocompatibility. After CO2 capture, the dissolved O2 concentration averaged 4.04 ± 0.34 mg L-1 (n = 8). Although microbial CO2 conversion could mitigate thermally accelerated oxidative degradation by these impurities, the agents could still be vulnerable to microbial degradation. Some agents, such as piperazine (**27**), methyldiethanolamine (**15**), 2-amino-2-methyl-1-propanol (7), and 2-diethylaminoethanol (**18**), are recalcitrant carbon sources resistant to anaerobic biodegradation, whereas monoethanolamine (**1**) and diethanolamine (**10**) undergo microbial degradation 1. However, stability in archaeal-dominated BICCU systems remains unexplored and requires long-term testing with repeated absorption-conversion cycles to assess their durability.

1. **
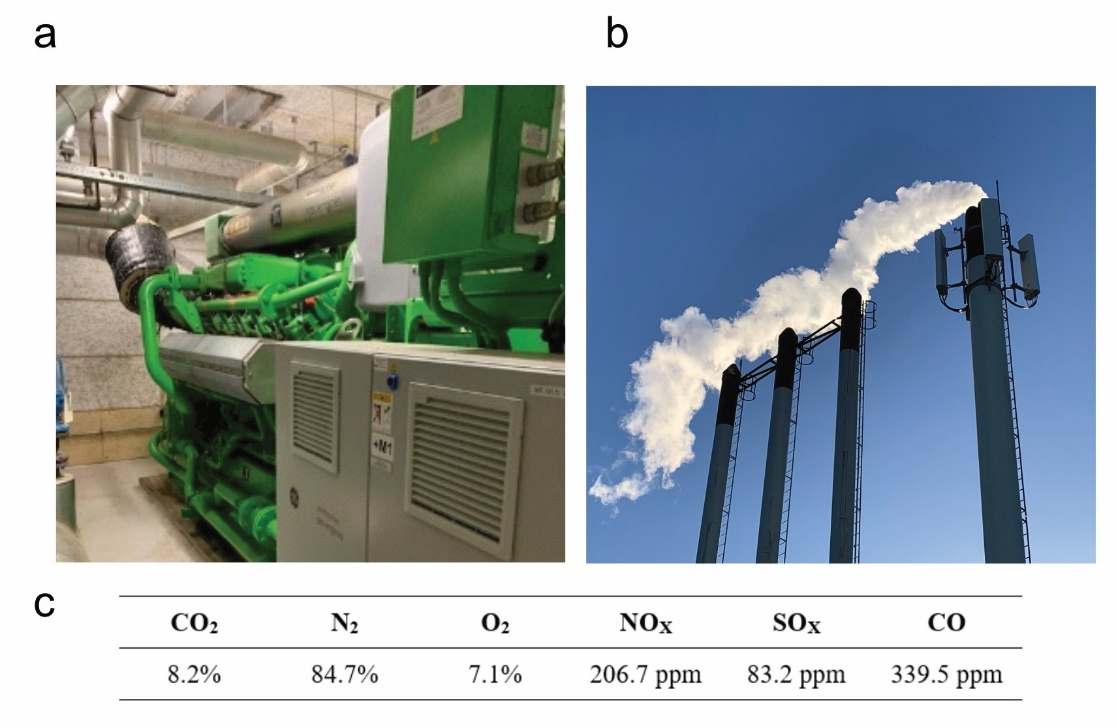
**

**Figure S1:** (a) Photograph of the 625 kW biogas engine and (b) exhaust stacks used for (c) analysing the dry composition of dilute CO2 concentration and impurities of raw flue gas.

**1. Chemical and physical characteristics of amine-based capture agents**

Table S1: Overview of capture agents screened for biocompatibility with their chemical and physical properties.

| **Capture agent** | **Octanol-water partition  coefficient** | **Median lethal dose**  [mg kg-1] | **Molar refractivity**  [cm3 mol-1] | **Volatility**  [atm m3 mol-1] | **Topological polar surface area** [Å2] | **Molecular weight**  [g mol-1] |
| --- | --- | --- | --- | --- | --- | --- |
| **Primary amines** | | | | | | |
| Monoethanolamine (**1**) | –1.3 | 1720 | 16.34 | 1.64 × 10–10 | 46.3 | 61.08 |
| 3‑Amino‑1‑propanol (**2**) | –1.1 | 2779 | 20.91 | 4.88 × 10–10 | 46.3 | 75.11 |
| 4-Aminobutan‑1‑ol (**3**) | –1.1 | 1150 | 25.34 | 6.48 × 10–10 | 46.3 | 89.14 |
| 5-Aminopentan‑1‑ol (**4**) | –0.3 | 500 | 29.88 | 8.60 × 10–10 | 46.3 | 103.16 |
| Benzylamine (**5**) | 1.1 | 552 | 34.43 | 1.39 × 10–5 | 26.0 | 107.15 |
| Aniline (**6**) | 0.9 | 250 | 30.67 | 1.97 × 10–6 | 26.0 | 93.13 |
| 2‑Amino‑2‑methyl‑1‑ propanol (**7**) | –0.8 | 2900 | 25.45 | 1.41 × 10–8 | 46.3 | 89.14 |
| **Secondary amines** | | | | | | |
| Diethylamine (**8**) | 0.6 | 500 | 24.35 | 2.41 × 10–5 | 12.0 | 73.14 |
| 2‑(Ethylamino)ethan‑1‑ol (**9**) | –0.5 | 1000 | 25.75 | 1.07 × 10–9 | 32.3 | 89.14 |
| Diethanolamine (**10**) | –1.4 | 680 | 27.03 | 3.95 × 10–11 | 52.5 | 105.14 |
| *N,O*‑Dimethylhydroxyl amine hydrochloride (**11**) | 1.0 | N/A | 30.69 | 4.90 × 10–6 | 21.3 | 97.54 |
| **Tertiary amines** | | | | | | |
| *N,N*‑Diisopropylethyl amine (**12**) | 2.2 | 317 | 43.52 | 1.51 × 10–4 | 3.2 | 129.24 |
| 2‑(Diisopropylamino) ethanol (**13**) | 1.2 | 860 | 46.52 | 5.19 × 10–8 | 23.5 | 145.24 |
| 2‑Dimethylamino ethanol (**14**) | –0.4 | 2000 | 25.94 | 1.80 × 10–9 | 23.5 | 89.14 |
| Methyldiethanol amine (**15**) | –1.1 | 1945 | 31.97 | 3.08 × 10–11 | 43.7 | 119.16 |
| *N*‑Butyldiethanol amine (**16**) | 0.1 | 4250 | 45.43 | 2.01 × 10–10 | 43.7 | 161.24 |
| Triethylamine (**17**) | 1.4 | 460 | 33.86 | 1.39 × 10–4 | 3.2 | 101.19 |
| 2‑Diethylamino ethanol (**18**) | 0.3 | 1300 | 35.17 | 5.48 × 10–7 | 23.5 | 117.19 |
| *N*‑Ethyldiethanol amine (**19**) | 0.2 | 4570 | 36.45 | 1.10 × 10–10 | 43.7 | 133.19 |
| Triethanolamine (**20**) | –1.0 | 8000 | 37.91 | 7.05 × 10–13 | 63.9 | 149.19 |
| **Di/tri/tetra amines** | | | | | | |
| Ethylenediamine (**21**) | –2.0 | 1000 | 18.25 | 1.70 × 10–9 | 52.0 | 60.10 |
| *N,N'*‑Bis(2‑aminoethyl)‑ 1,3‑propanediamine (**22**) | –2.2 | 654 | 48.60 | 1.23 × 10–16 | 76.1 | 160.26 |
| 1,1,4,7,10,10‑Hexamethyl triethylenetetramine (**23**) | 0.4 | 316 | 73.94 | 1.04 × 10–14 | 13.0 | 230.39 |
| Tris(2‑dimethyl aminoethyl)amine (**24**) | 0.4 | 246 | 72.24 | 1.04 × 10–14 | 13.0 | 230.39 |
| *N,N,N',N'*‑Tetrakis(2‑hydroxyethyl)ethylenediamine (**25**) | –2.4 | N/A | 58.36 | 1.34 × 10–16 | 87.4 | 236.31 |
| *N,N*‑Dimethyl‑1,4‑phenyl diamine (**26**) | 1.8 | 50 | 44.49 | 3.03 × 10–8 | 29.3 | 136.19 |
| **Piperazine derivatives** | | | | | | |
| Piperazine (**27**) | –1.5 | 1900 | 21.93 | 9.87 × 10–8 | 24.1 | 86.14 |
| 1-(2-Hydroxyethyl) piperazine (**28**) | –1.1 | 5215 | 37.66 | 3.40 × 10–9 | 35.5 | 130.19 |
| 1,4-Bis(2-hydroxyethyl) piperazine (**29**) | –1.3 | 4092 | 43.01 | 2.50 × 10–14 | 46.9 | 174.24 |
| 1-(2-Aminoethyl) piperazine (**30**) | –1.3 | 2108 | 38.68 | 6.60 × 10–13 | 41.3 | 129.20 |
| 1-(2-Pyridyl)piperazine (**31**) | 0.7 | N/A | 51.74 | 1.48 × 10–11 | 28.2 | 163.22 |
| 1-(4-Pyridyl)piperazine (**32**) | 0.3 | N/A | 49.97 | 1.48 × 10–11 | 28.2 | 163.22 |

**2. Molecular structural characteristics of amine-based capture agents**

Table S2: Overview of capture agents screened for biocompatibility with their structural features.

| **Capture agent** | **Amine groups (1°/2°/3°)** | **Hydrogen  donors** | **Hydrogen  acceptors** | **Heavy  atoms** | **Ring  structure** | **Hydroxyl group** |
| --- | --- | --- | --- | --- | --- | --- |
| **Primary amines** | | | | | | |
| Monoethanolamine (**1**) | 1/0/0 | 2 | 2 | 4 | 0 | 1 |
| 3‑Amino‑1‑propanol (**2**) | 1/0/0 | 2 | 2 | 5 | 0 | 1 |
| 4-Aminobutan‑1‑ol (**3**) | 1/0/0 | 2 | 2 | 6 | 0 | 1 |
| 5-Aminopentan‑1‑ol (**4**) | 1/0/0 | 2 | 2 | 7 | 0 | 1 |
| Benzylamine (**5**) | 1/0/0 | 1 | 1 | 8 | 1 | 0 |
| Aniline (**6**) | 1/0/0 | 1 | 1 | 7 | 1 | 0 |
| 2‑Amino‑2‑methyl‑1‑ propanol (**7**) | 1/0/0 | 2 | 2 | 6 | 0 | 1 |
| **Secondary amines** | | | | | | |
| Diethylamine (**8**) | 0/1/0 | 1 | 1 | 5 | 0 | 0 |
| 2‑(Ethylamino)ethan‑1‑ol (**9**) | 0/1/0 | 2 | 2 | 6 | 0 | 1 |
| Diethanolamine (**10**) | 0/1/0 | 3 | 3 | 7 | 0 | 2 |
| *N,O*‑Dimethylhydroxyl amine hydrochloride (**11**) | 0/1/0 | 2 | 2 | 5 | 0 | 0 |
| **Tertiary amines** | | | | | | |
| *N,N*‑Diisopropylethyl amine (**12**) | 0/0/1 | 0 | 1 | 9 | 0 | 0 |
| 2‑(Diisopropylamino) ethanol (**13**) | 0/0/1 | 1 | 2 | 10 | 0 | 1 |
| 2‑Dimethylamino ethanol (**14**) | 0/0/1 | 1 | 2 | 6 | 0 | 1 |
| Methyldiethanol amine (**15**) | 0/0/1 | 2 | 3 | 8 | 0 | 2 |
| *N*‑Butyldiethanol amine (**16**) | 0/0/1 | 2 | 3 | 11 | 0 | 2 |
| Triethylamine (**17**) | 0/0/1 | 0 | 1 | 7 | 0 | 0 |
| 2‑Diethylamino ethanol (**18**) | 0/0/1 | 1 | 2 | 8 | 0 | 1 |
| *N*‑Ethyldiethanol amine (**19**) | 0/0/1 | 2 | 3 | 9 | 0 | 2 |
| Triethanolamine (**20**) | 0/0/1 | 3 | 4 | 10 | 0 | 3 |
| **Di/tri/tetra amines** | | | | | | |
| Ethylenediamine (**21**) | 2/0/0 | 2 | 2 | 4 | 0 | 0 |
| *N,N'*‑Bis(2‑aminoethyl)‑ 1,3‑propanediamine (**22**) | 2/2/0 | 4 | 4 | 11 | 0 | 0 |
| 1,1,4,7,10,10‑Hexamethyl triethylenetetramine (**23**) | 0/0/4 | 0 | 4 | 16 | 0 | 0 |
| Tris(2‑dimethyl aminoethyl)amine (**24**) | 0/0/4 | 0 | 4 | 16 | 0 | 0 |
| *N,N,N',N'*‑Tetrakis(2‑hydroxyethyl)ethylenediamine (**25**) | 0/0/2 | 4 | 6 | 16 | 0 | 4 |
| *N,N*‑Dimethyl‑1,4‑phenyl diamine (**26**) | 1/0/1 | 1 | 2 | 10 | 1 | 0 |
| **Piperazine derivatives** | | | | | | |
| Piperazine (**27**) | 0/2/0 | 2 | 2 | 6 | 1 | 0 |
| 1-(2-Hydroxyethyl) piperazine (**28**) | 0/1/1 | 2 | 3 | 9 | 1 | 1 |
| 1,4-Bis(2-hydroxyethyl) piperazine (**29**) | 0/0/2 | 2 | 4 | 12 | 1 | 2 |
| 1-(2-Aminoethyl) piperazine (**30**) | 1/1/1 | 2 | 3 | 9 | 1 | 0 |
| 1-(2-Pyridyl)piperazine (**31**) | 0/1/2 | 1 | 3 | 12 | 2 | 0 |
| 1-(4-Pyridyl)piperazine (**32**) | 0/1/2 | 1 | 3 | 12 | 2 | 0 |

**3. Molecular structural characteristics of amine-based capture agents (extended)**

Table S3: Overview of capture agents screened for biocompatibility with molecular structural features.

| **Capture agent** | **H/C ratio** | **Halkyl/C**  **ratio** | **H/C ratio per N** | **Halkyl/C ratio per N** | **H/C ratio per heteroatom** | **Halkyl/C ratio per heteroatom** |
| --- | --- | --- | --- | --- | --- | --- |
| **Primary amines** | | | | | | |
| Monoethanolamine (**1**) | 3.50 | 2.00 | 3.50 | 2.00 | 1.75 | 1.00 |
| 3‑Amino‑1‑propanol (**2**) | 3.00 | 2.00 | 3.00 | 2.00 | 1.50 | 1.00 |
| 4-Aminobutan‑1‑ol (**3**) | 2.75 | 2.00 | 2.75 | 2.00 | 1.38 | 1.00 |
| 5-Aminopentan‑1‑ol (**4**) | 2.60 | 2.00 | 2.60 | 2.00 | 1.30 | 1.00 |
| Benzylamine (**5**) | 1.29 | 1.00 | 1.29 | 1.00 | 1.29 | 1.00 |
| Aniline (**6**) | 1.17 | 0.83 | 1.17 | 0.83 | 1.17 | 0.83 |
| 2‑Amino‑2‑methyl‑1‑ propanol (**7**) | 2.50 | 2.33 | 2.50 | 2.33 | 1.25 | 1.17 |
| **Secondary amines** | | | | | | |
| Diethylamine (**8**) | 2.75 | 2.50 | 2.75 | 2.50 | 2.75 | 2.50 |
| 2‑(Ethylamino)ethan‑1‑ol (**9**) | 2.75 | 2.00 | 2.75 | 2.00 | 1.38 | 1.00 |
| Diethanolamine (**10**) | 2.75 | 2.00 | 2.75 | 2.00 | 0.92 | 0.67 |
| *N,O*‑Dimethylhydroxyl amine hydrochloride (**11**) | 4.00 | 3.50 | 4.00 | 3.50 | 2.00 | 1.75 |
| **Tertiary amines** | | | | | | |
| *N,N*‑Diisopropylethyl amine (**12**) | 2.38 | 2.38 | 2.38 | 2.38 | 2.38 | 2.38 |
| 2‑(Diisopropylamino) ethanol (**13**) | 2.38 | 2.25 | 2.38 | 2.25 | 1.19 | 1.13 |
| 2‑Dimethylamino ethanol (**14**) | 2.75 | 2.25 | 2.75 | 2.25 | 1.38 | 1.13 |
| Methyldiethanol amine (**15**) | 2.60 | 2.20 | 2.60 | 2.20 | 0.87 | 0.73 |
| *N*‑Butyldiethanol amine (**16**) | 2.38 | 2.13 | 2.38 | 2.13 | 0.79 | 0.71 |
| Triethylamine (**17**) | 2.50 | 2.50 | 2.50 | 2.50 | 2.50 | 2.50 |
| 2‑Diethylamino ethanol (**18**) | 2.75 | 2.50 | 2.75 | 2.50 | 1.38 | 1.25 |
| *N*‑Ethyldiethanol amine (**19**) | 2.50 | 2.17 | 2.50 | 2.17 | 0.83 | 0.72 |
| Triethanolamine (**20**) | 2.50 | 2.00 | 2.50 | 2.00 | 0.63 | 0.50 |
| **Di/tri/tetra amines** | | | | | | |
| Ethylenediamine (**21**) | 4.00 | 2.00 | 2.00 | 1.00 | 2.00 | 1.00 |
| *N,N'*‑Bis(2‑aminoethyl)‑ 1,3‑propanediamine (**22**) | 2.86 | 2.00 | 0.71 | 0.50 | 0.71 | 0.50 |
| 1,1,4,7,10,10‑Hexamethyl triethylenetetramine (**23**) | 2.50 | 2.50 | 0.63 | 0.63 | 0.63 | 0.63 |
| Tris(2‑dimethyl aminoethyl)amine (**24**) | 2.50 | 2.50 | 0.63 | 0.63 | 0.63 | 0.63 |
| *N,N,N',N'*‑Tetrakis(2‑hydroxyethyl)ethylenediamine (**25**) | 2.44 | 2.00 | 1.22 | 1.00 | 0.41 | 0.50 |
| *N,N*‑Dimethyl‑1,4‑phenyl diamine (**26**) | 1.50 | 1.25 | 0.75 | 0.63 | 0.75 | 0.63 |
| **Piperazine derivatives** | | | | | | |
| Piperazine (**27**) | 2.50 | 2.00 | 1.25 | 1.00 | 1.25 | 1.00 |
| 1-(2-Hydroxyethyl) piperazine (**28**) | 2.33 | 2.00 | 1.17 | 1.00 | 0.78 | 0.67 |
| 1,4-Bis(2-hydroxyethyl) piperazine (**29**) | 2.25 | 2.00 | 1.13 | 1.00 | 0.56 | 0.50 |
| 1-(2-Aminoethyl) piperazine (**30**) | 2.50 | 2.00 | 0.83 | 0.67 | 0.83 | 0.67 |
| 1-(2-Pyridyl)piperazine (**31**) | 1.44 | 1.33 | 0.48 | 0.44 | 0.48 | 0.44 |
| 1-(4-Pyridyl)piperazine (**32**) | 1.44 | 1.33 | 0.48 | 0.44 | 0.48 | 0.44 |

**4. Chemical capture agent characterization of CO2 loading capacity and base dissociation constants**

**Table S4:** Base dissociation constants and experimental CO2 loading capacities of the evaluated 32 aqueous amine solutions.

| **Capture agents** | **CO2 loading a (molCO2 molCA–1)** | **Base dissociation constant (p*K*b)** |
| --- | --- | --- |
| **Primary amines** | | |
| Monoethanolamine (**1**) | 0.71 | 4.50 2 |
| 3-Amino-1-propanol (**2**) | 0.86 | 4.04 3 |
| 4-Aminobutan-1-ol (**3**) | 0.92 | 3.68 b |
| 5-Aminopentan-1-ol (**4**) | 0.80 | 3.54 b |
| Benzylamine (**5**) | 0.71 | 4.67 4 |
| Aniline (**6**) | 0.10 | 9.40 5 |
| 2-Amino-2-methyl-1-propanol (**7**) | 0.99 | 4.28 6 |
| **Secondary amines** | | |
| Diethylamine (**8**) | 0.75 | 2.96 7 |
| 2-(Ethylamino)ethan-1-ol (**9**) | 0.91 | 4.15 8 |
| Diethanolamine (**10**) | 0.87 | 5.04 9 |
| *N,O*-Dimethylhydroxylamine hydrochloride (**11**) | 0.33 | 4.75 10 |
| **Tertiary amines** | | |
| *N,N*-Diisopropylethylamine (**12**) | 0.85 | 3.00 b |
| 2-(Diisopropylamino)ethanol (**13**) | 0.61 | 3.20 b |
| 2-Dimethylaminoethanol (**14**) | 0.68 | 4.77 8 |
| Methyldiethanolamine (**15**) | 0.73 | 5.48 3 |
| *N*-Butyldiethanolamine (**16**) | 0.78 | 5.11 11 |
| Triethylamine (**17**) | 0.91 | 3.25 12 |
| 2-Diethylaminoethanol (**18**) | 1.15 | 4.25 8 |
| *N*-Ethyldiethanolamine (**19**) | 0.55 | 5.08 11 |
| Triethanolamine (**20**) | 0.65 | 6.24 2 |
| **Di/tri/tetra amines** | | |
| Ethylenediamine (**21**) | 1.14 | 4.07 13 |
| *N,N'*-Bis(2-aminoethyl)-1,3-propanediamine (**22**) | 2.26 | 3.80 c |
| 1,1,4,7,10,10-Hexamethyltriethylenetetramine (**23**) | 2.01 | 4.80 14 |
| Tris(2-dimethylaminoethyl)amine (**24**) | 2.15 | 5.01 c |
| *N,N,N',N'*-Tetrakis(2-hydroxyethyl)ethylenediamine (**25**) | 0.79 | 5.62 15 |
| *N,N*-Dimethyl-1,4-phenyldiamine (**26**) | 0.73 | 7.41 16 |
| **Piperazine derivatives** | | |
| Piperazine (**27**) | 0.96 | 4.27 17 |
| 1-(2-Hydroxyethyl)piperazine (**28**) | 0.97 | 4.91 17 |
| 1,4-Bis(2-hydroxyethyl)piperazine (**29**) | 0.64 | 5.32 d |
| 1-(2-Aminoethyl)piperazine (**30**) | 1.49 | 4.48 b |
| 1-(2-Pyridyl)piperazine (**31**) | 0.91 | 5.10 18 |
| 1-(4-Pyridyl)piperazine (**32**) | Solid formation | 5.05 d |

a CO2 loading of the aqueous amine solutions (20 wt%) was measured at 40 °C under a pure CO₂ flow rate of 4 mL min–1.
b Compiled from publicly available chemical databases. c Predicted. d Measured in this work.

**5. Characterization of (diethanolamine)3triazine**

**1H NMR** (400 MHz, DMSO-d6) *δ* (ppm): 4.69 (s, 6H), 3.54 (m, 24H). **13C NMR** (100 MHz, DMSO-d6) *δ* (ppm): 164.4, 59.5, 50.5. **HRMS** (ESI+) m/z calculated for C15H31N6O6+ [M+H]+: 391.2300; found: 391.2315.


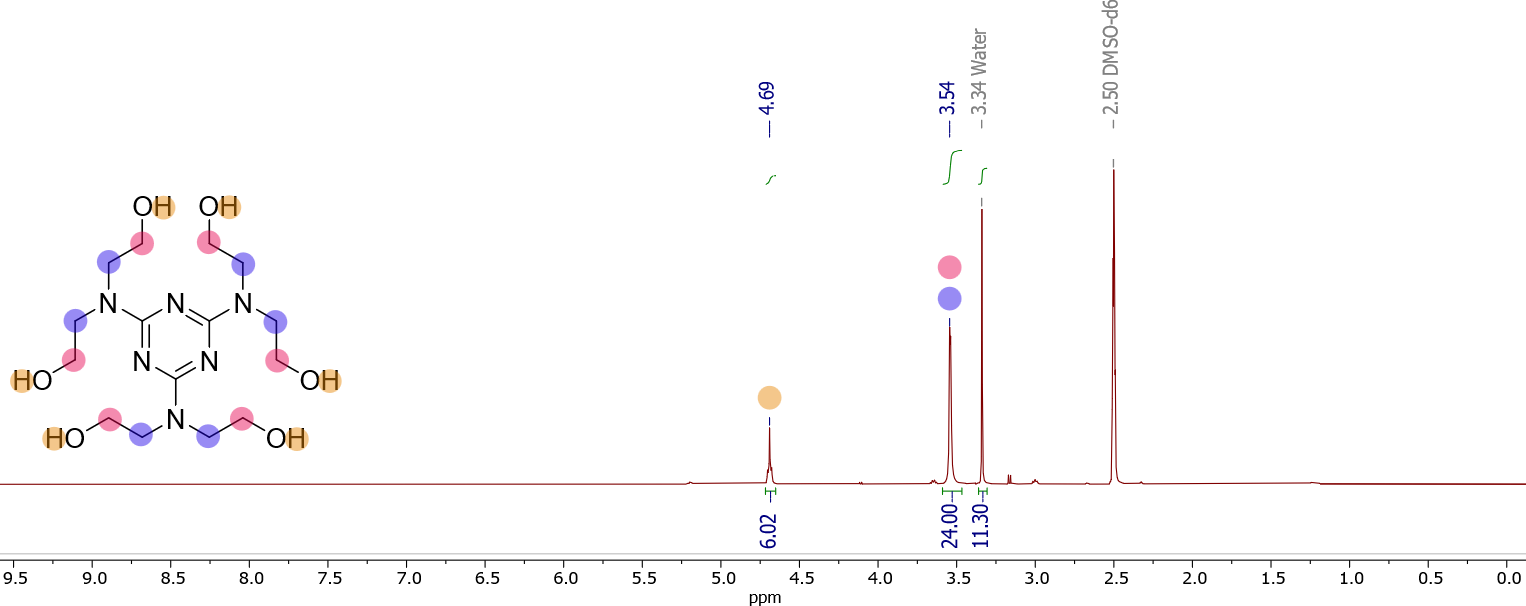


**Figure S2:** 1H-NMR spectrumof (diethanolamine)3triazinein DMSO-d6.


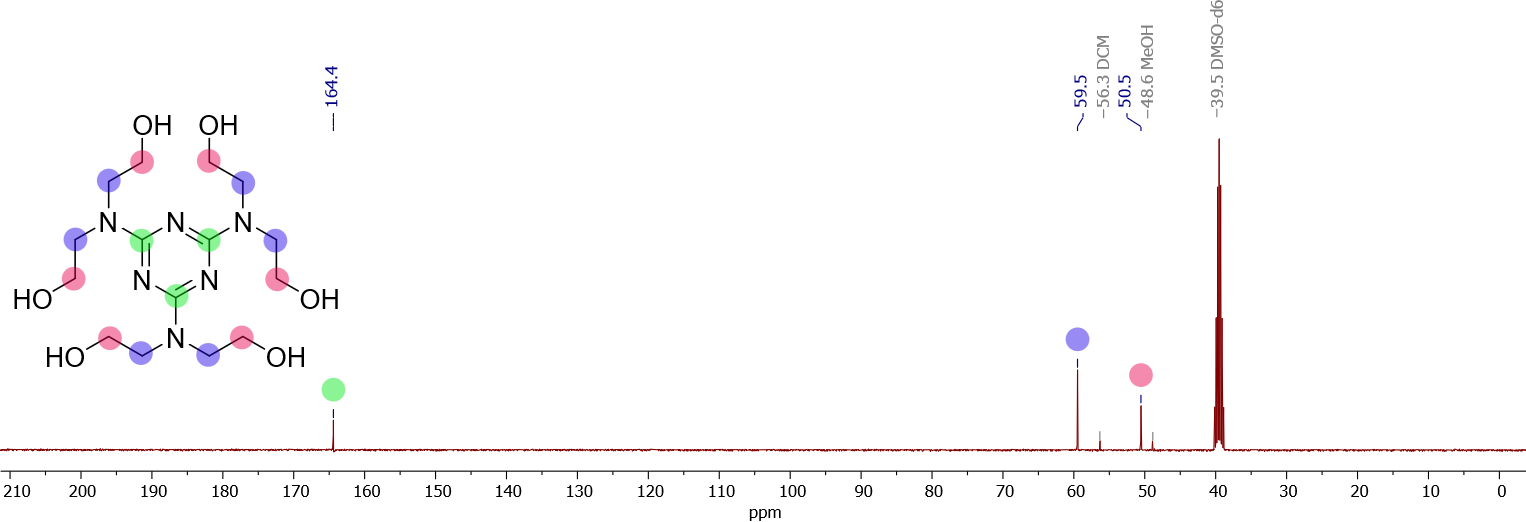


**Figure S3:** 13C-NMR spectrumof (diethanolamine)3triazine in DMSO-d6.

**
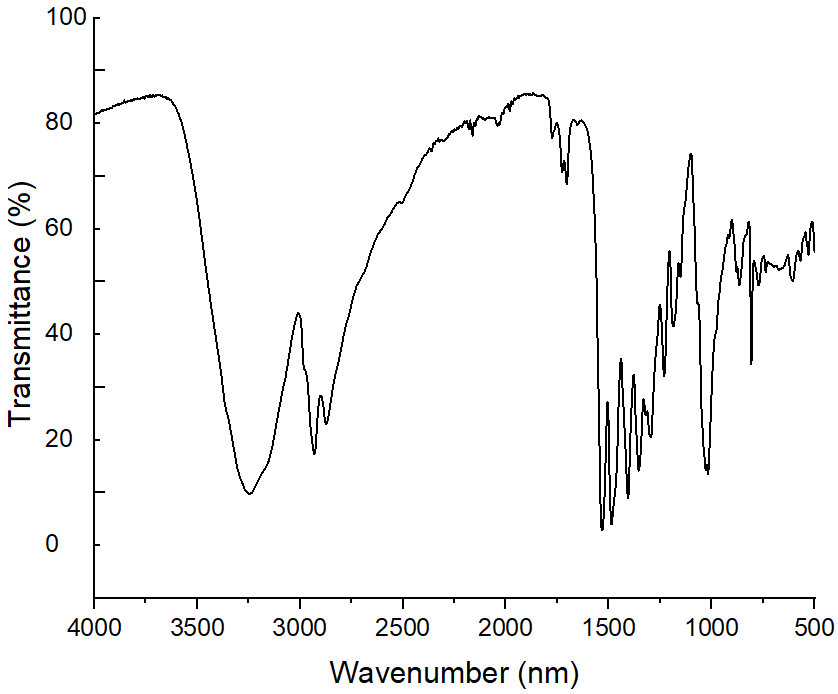
**

**Figure S4:** ATR-IR spectrumof (diethanolamine)3triazine.

**6. Biocompatible capture agents uphold microbiome stability by controlling microbial carryover**

Fig. S5 compares the rationally designed capture agent (diethanolamine)₃triazine with melamine and monoethanolamine (**1**). The superior performance of the new agent supports a hydraulic retention time of 38.6 h−well above the microbial doubling time (~5 h under ideal conditions). This ensures stable retention of the methanogenic biocatalyst within the anaerobic bioreactor and prevents its unintended carryover into the O2-rich absorber.


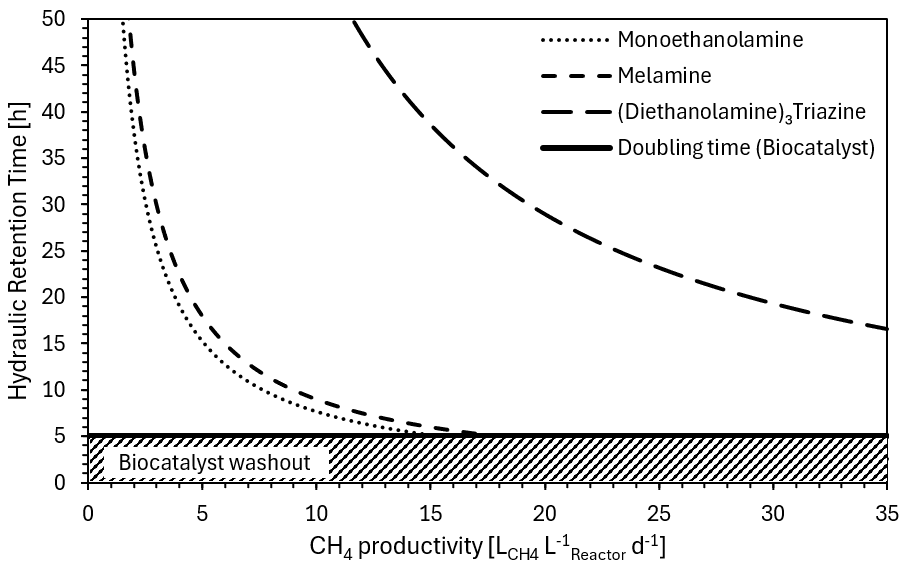


**Figure S5:** Improved biocompatibility and CO2 loading capacity, enabling longer hydraulic retention times and stable retention of the methanogenic biocatalyst in the BICCU process.

**7. References**

1. Henry, I. A., Kowarz, V. & Østgaard, K. Aerobic and anoxic biodegradability of amines applied in CO2-capture. *International Journal of Greenhouse Gas Control* **58**, 266–275 (2017).

2. Perry, D. D. *Dissociation Constants of Organic Bases in Aqueous Solution*. (Butterworth & Co Publishers Ltd, 1965).

3. Schwabe, K., Graichen, W. & Spiethoff, D. Physicochemical investigations on alkanolamines. *Zeitschrift für Physikalische Chemie* **20**, 68–82 (1959).

4. Weast, R. C. *Handbook of Chemistry and Physics*. (1985).

5. Biggs, A. I. & Robinson, R. A. The ionisation constants of some substituted anilines and phenols: a test of the Hammett relation. *J. Chem. Soc.* 388–393 (1961).

6. Samuel, G. & Schram, A. F. The Basic Dissociation Constants of Some Aliphatic Hydroxyamines. *J. Am. Chem. Soc.* **69**, 1213–1214 (1947).

7. Somerville, W. C. An investigation of the degrees of hydration of the alkyl amines in aqueous solution. *J. Phys. Chem.* **35**, 2412–2433 (1931).

8. Douhéret, G. & Pariaud, J.-C. N° 125. — Ionisation et structure d’amino-éthanols N-substitués. *Journal de Chimie Physique* **59**, 1013–1020 (1962).

9. Chremos, G. & Zimmerman Jr, H. K. Aminoalcohols as buffering agents. II. Protolysis equilibria of diethanolamine. *Texas Journal of Science* **59**, 467–470 (1959).

10. Williams, R. pKa data compiled by R. Williams [Dataset]. *Organic Chemistry Data* https://organicchemistrydata.org/hansreich/resources/pka/pka_data/pka-compilation-williams.pdf (2022).

11. Chremos, G. N., Zimmerman, H. K., Cantrell, W., Meyer, R. B. & Zaetsch, E. H. Protolysis Equilibria of N-Substituted Diethanolamines. *Zeitschrift für Physikalische Chemie* **35**, 129–132 (1962).

12. John, F. & Waldron, H. A. *Patty’s Industrial Hygiene and Toxicology 4th Revised Edition. Volume II, Part D*. (John Wiley, New York, 1994). doi:https://doi.org/10.1016/0003-4878(95)90005-5.

13. Everett, D. H. & Pinsent, B. W. R. The dissociation constants of ethylene diammonium and hexamethylene diammonium ions from 0° to 60° C. *Proceedings of the Royal Society of London. A. Mathematical and Physical Sciences* **215**, 416–429 (1952).

14. Rometsch, R., Marxer, A. & Miescher, K. Dissoziationsregeln bei Polyaminen. Dissoziation und Quaternisierbarkeit. *Helv. Chim. Acta* **34**, 1611–1618 (1951).

15. Rorabacher, D. B., Turan, T. S., Defever, J. A. & Nickels, W. G. Steric effects in chelation kinetics. Formation and dissociation of nickel(II) complexes with branched poly(amino alcohols) related to ethylenediaminetetraacetic acid. *Inorg. Chem.* **8**, 1498–1506 (1969).

16. Hall, N. F. THE STRENGTH OF ORGANIC BASES IN GLACIAL ACETIC ACID SOLUTION1. *J. Am. Chem. Soc.* **52**, 5115–5128 (1930).

17. Khalili, F., Henni, A. & East, A. L. L. pKa Values of Some Piperazines at (298, 303, 313, and 323) K. *J. Chem. Eng. Data* **54**, 2914–2917 (2009).

18. Gaulton, A. *et al.* ChEMBL: a large-scale bioactivity database for drug discovery. *Nucleic Acids Res.* **40**, D1100–D1107 (2012).
